# Supplementary material for: Rapid and comprehensive diagnostic method for repeat expansion diseases using nanopore sequencing
Source: PubMed Central journal article supplement (PMC9606279; doi:10.1038/s41525-022-00331-y), 2022-10-26
Supplement: 41525_2022_331_MOESM2_ESM.pdf [file 41525_2022_331_MOESM2_ESM.pdf]

**Supplementary information for**

**Rapid and comprehensive diagnostic method for repeat expansion diseases using nanopore sequencing**

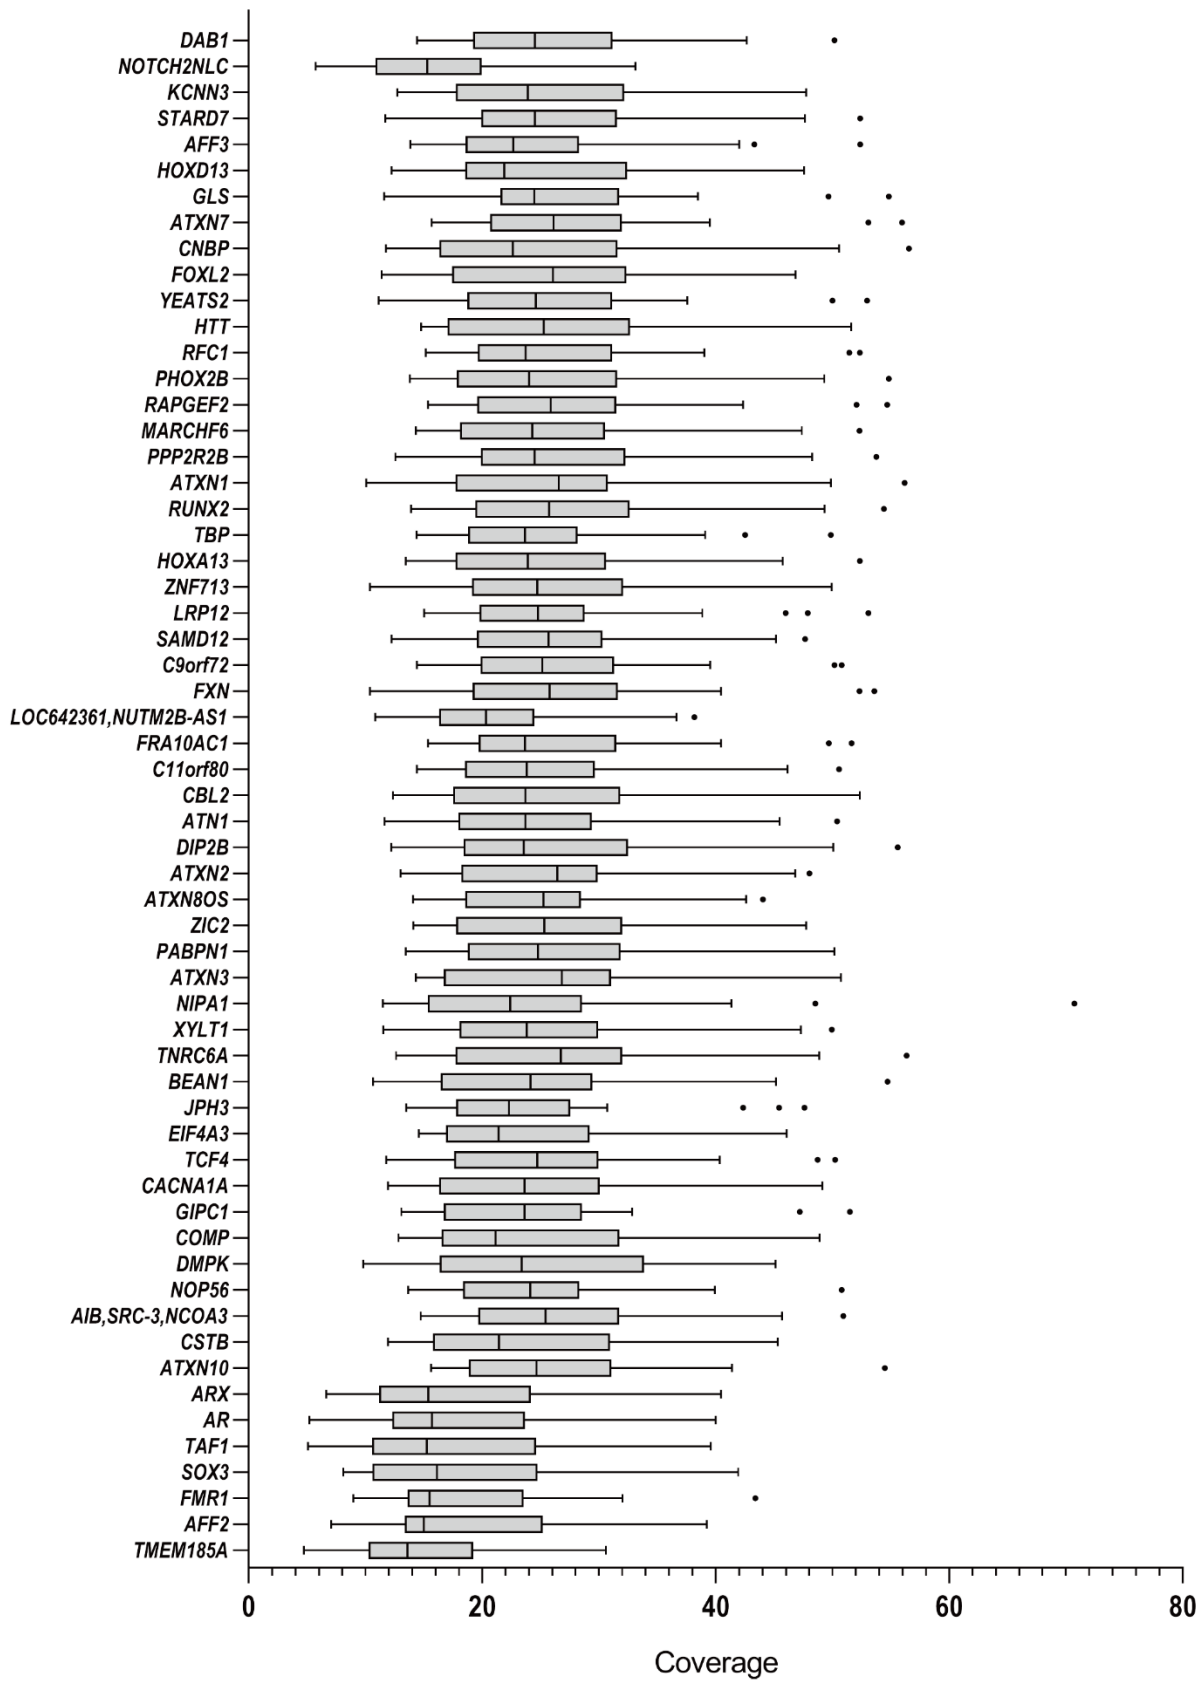

**Supplementary Figure 1** Box plot showing depth of coverage across all 59 targeted loci among the 22 patients of this study  
 Vertical line in the box indicates median coverage and dots indicate outliers.

### Patient 3

Rank #1 locus rejected  
*TNRC6A*  
 benign sequence expansion

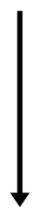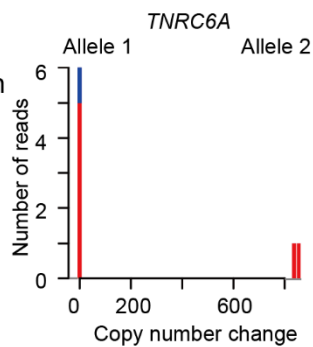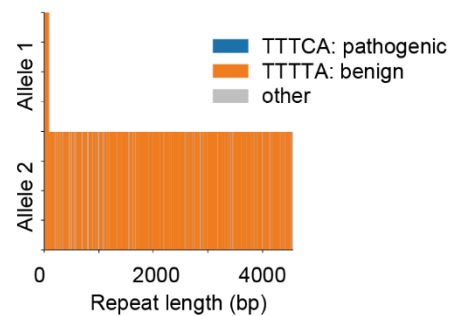

Rank #2 locus employed  
*CACNA1A*  
 abnormal expansion

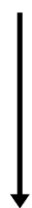

**Diagnosis: SCA6**

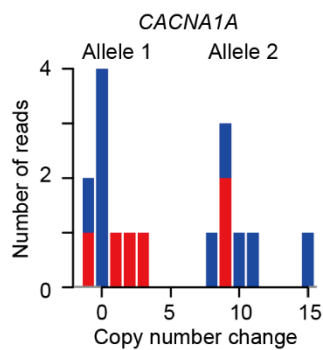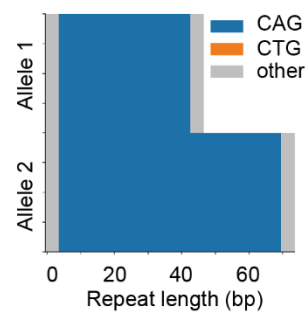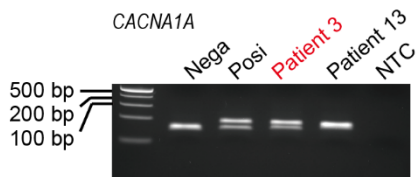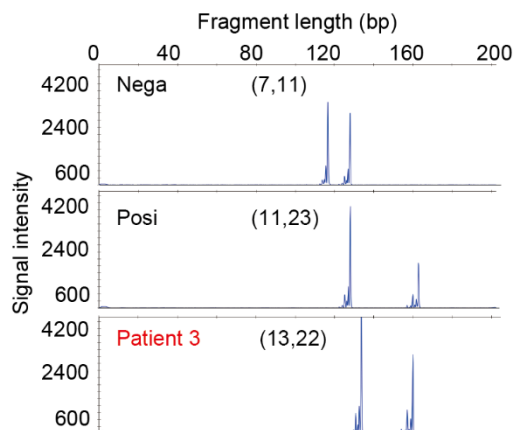

### Supplementary Figure 2 An example of successful identification of pathogenic repeat expansions in Patient 3

*TNRC6A* repeat expansion, which was ranked #1, was judged to be a polymorphism by examining the consensus sequence constructed from our flow.

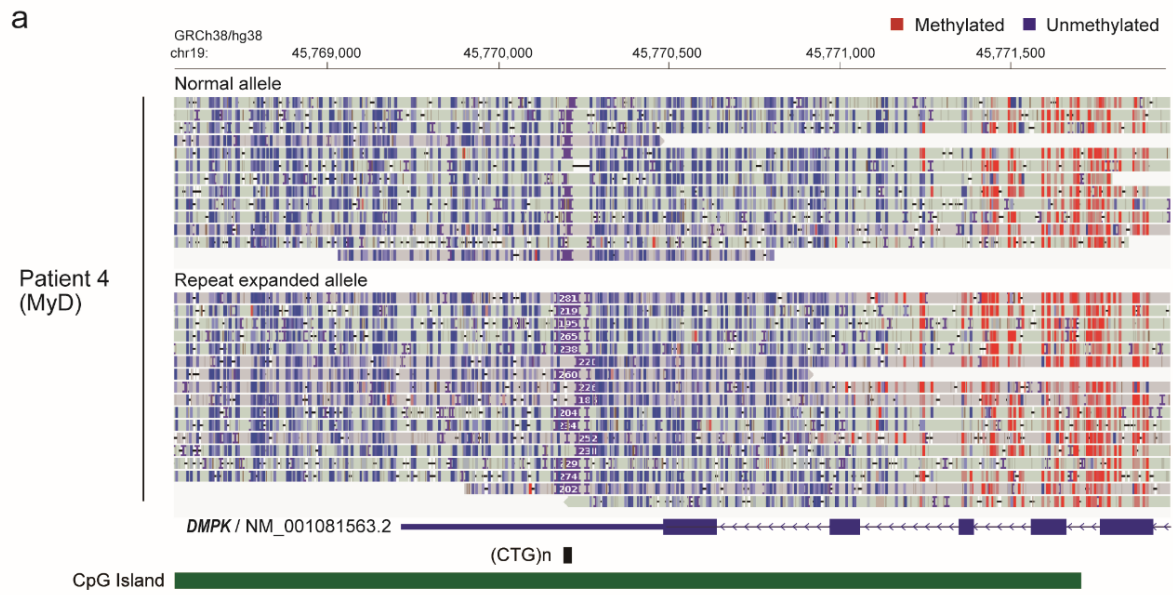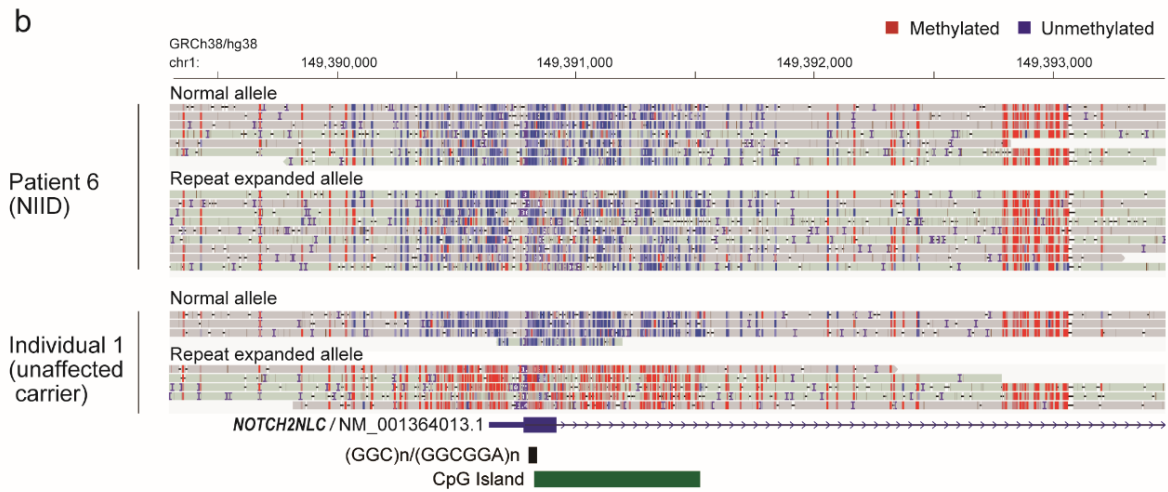

### Supplementary Figure 3 Methylation analysis in Patients 4 and 6, and Individual 1

**a** Methylation analysis in Patient 4 with an adult-onset, mild form of myotonic dystrophy and with a relatively short repeat expansion (approximately 100 repeats). **b** Methylation analysis in Patient 6 with NIID and asymptomatic Individual 1 with an extremely long repeat expansion in *NOTCH2NLC*. Red and blue bars indicate methylated and unmethylated cytosines at CpGs, respectively. MyD: myotonic dystrophy, NIID: neuronal intranuclear inclusion disease.

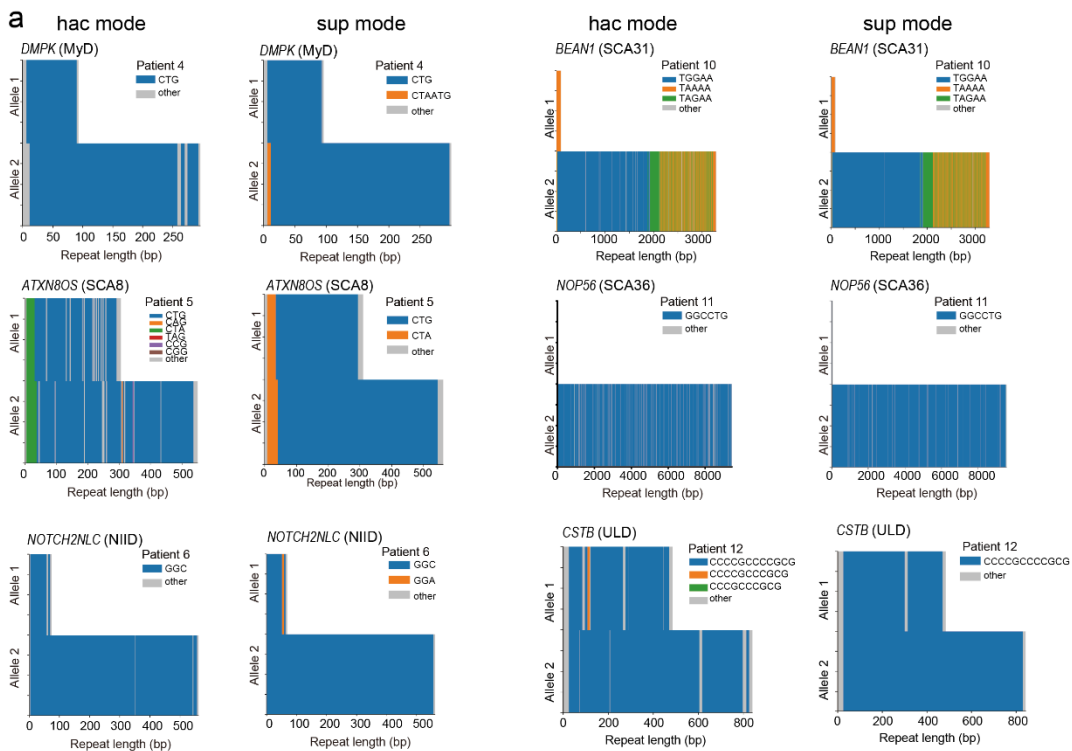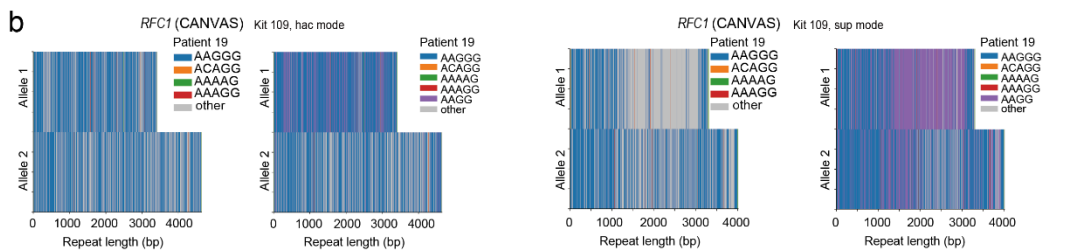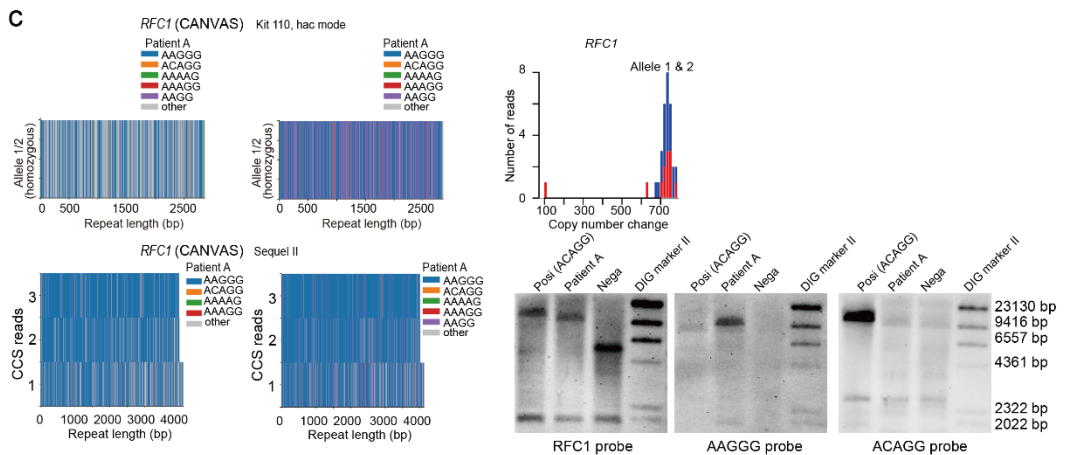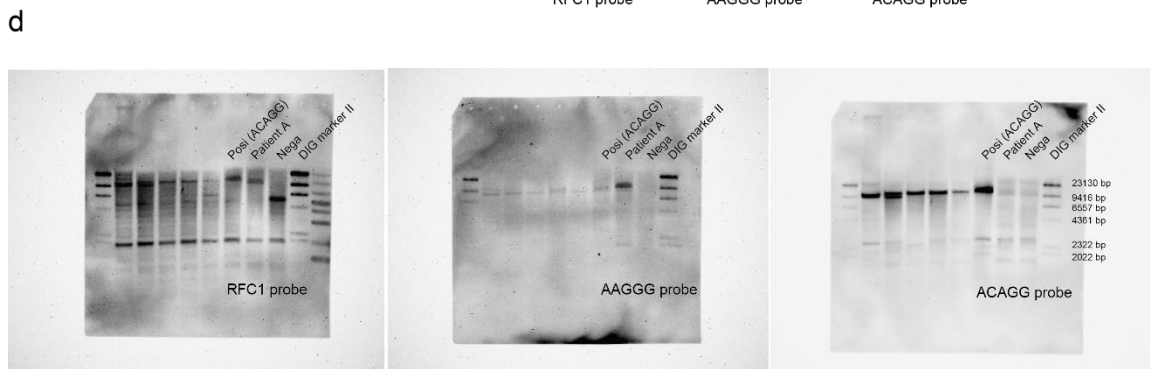

**Supplementary Figure 4 Comparison of sequence accuracy between hac and sup modes**

In **a** and **b**, left and right panels show consensus sequences generated under hac mode and sup mode, respectively. **a** Guppy basecalling in sup mode increased the raw read accuracy in Patients 4, 5, 6, 10, 11, and 12. Consensus sequences are depicted by waterfall plots. **b** For Patient 19 with AAGGG repeat expansion in *RFC1*, basecalling in sup mode did not increase raw read accuracy. “Other” sequences were mostly AAGG repeats. **c** Patient A with AAGGG repeat expansion in *RFC1* had been previously sequenced using T-LRS (targeted long-read sequencing) and high-fidelity long-read whole-genome sequencing (HiFi LR-WGS) using PacBio Sequel II system.<sup>1</sup> Upper left panel shows T-LRS sequencing using kit 110, while lower left panel shows HiFi- LR-WGS (Sequel II). In HiFi LR-WGS, the AAGG repeat was mostly absent, indicating that AAGG is the error sequence. Upper right panel shows a tandem-genotypes histogram of T-LRS showing that there was no significant strand-bias in read distribution. Lower right panel shows Southern blotting demonstrating that Patient A has AAGGG-specific repeat expansion. Note that repeat length seemed shortened in T-LRS, possibly because the repeat unit of AAGGG was recognized as AAGG. **d** Full, uncropped images of the Southern blotting shown in **c**. The blot shown in the left panel was performed first, and then the membrane was re-probed with custom-made digoxigenin (DIG)-labeled probe for AAGGG repeat detection (shown in the middle panel) secondly and was re-probed with custom-made DIG-labeled probe for ACAGG repeat detection lastly (shown in the right panel).

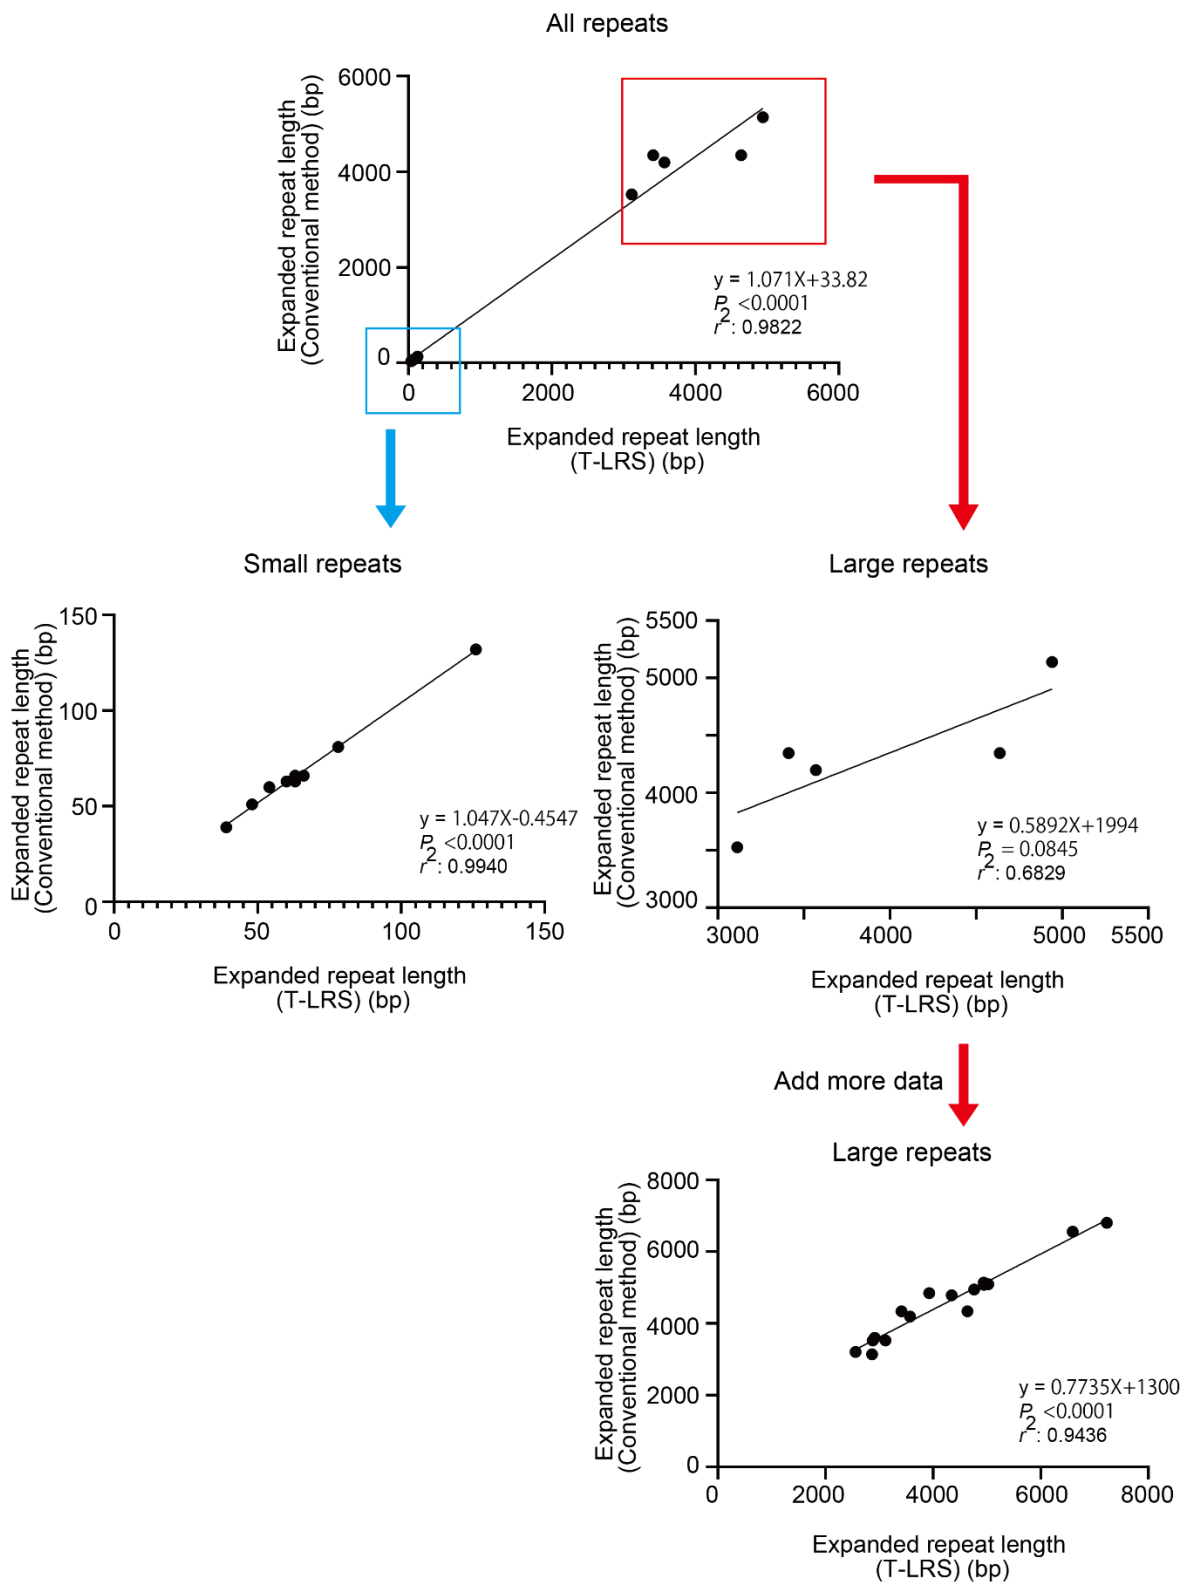

**Supplementary Figure 5 Correlation analysis of repeat length between conventional methods and T-LRS**

Upper panel shows overall correlation between repeat length obtained from T-LRS and conventional methods. In the middle, the left panel shows the correlation in small repeats while the right panel shows it in large repeats. Lower right panel shows significant correlation in large repeats after adding samples that were previously reported<sup>1</sup>.

**a** Patient 10 (*BEAN1*)

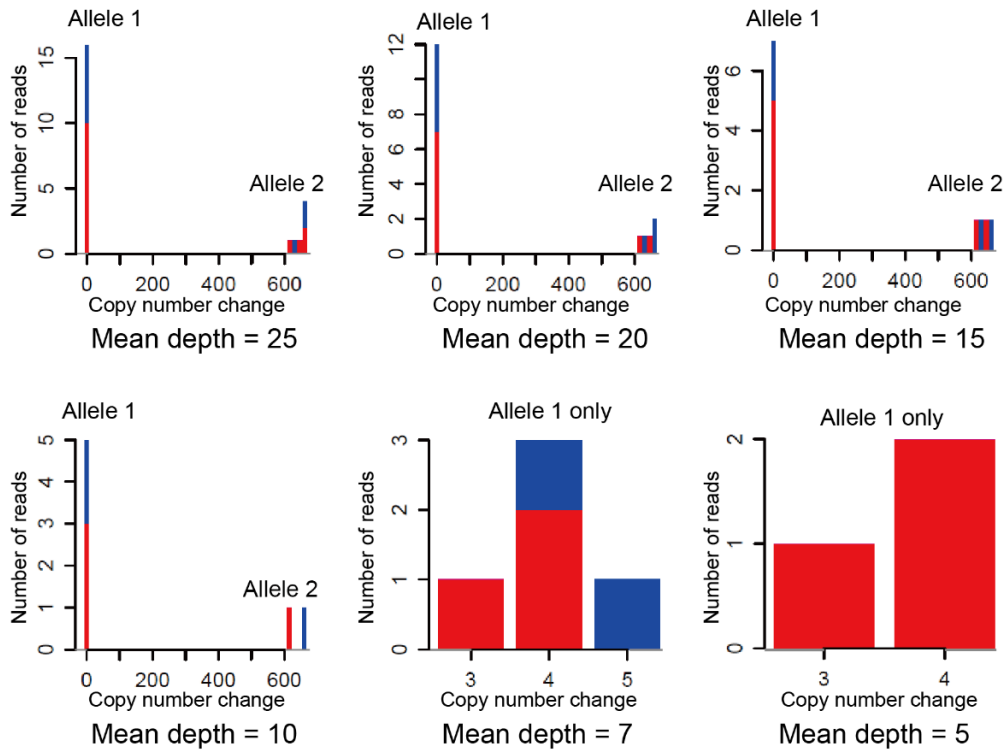

**b** Patient 18 (*RFC1*)

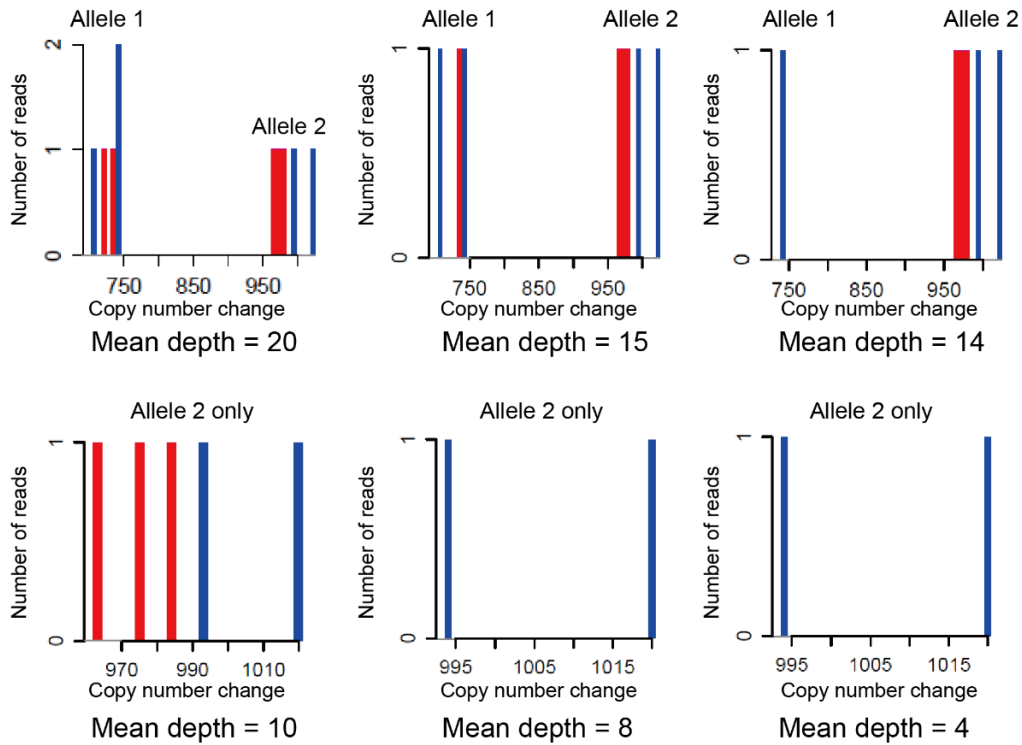

**Supplementary Figure 6 Down-sampling of fastq data to estimate the minimally required depth of T-LRS to differentiate two alleles**

Down-sampling at various proportions in **a** Patient 10 and **b** Patient 18. Note that with a depth of 10–15× or more, two alleles were able to be separated.



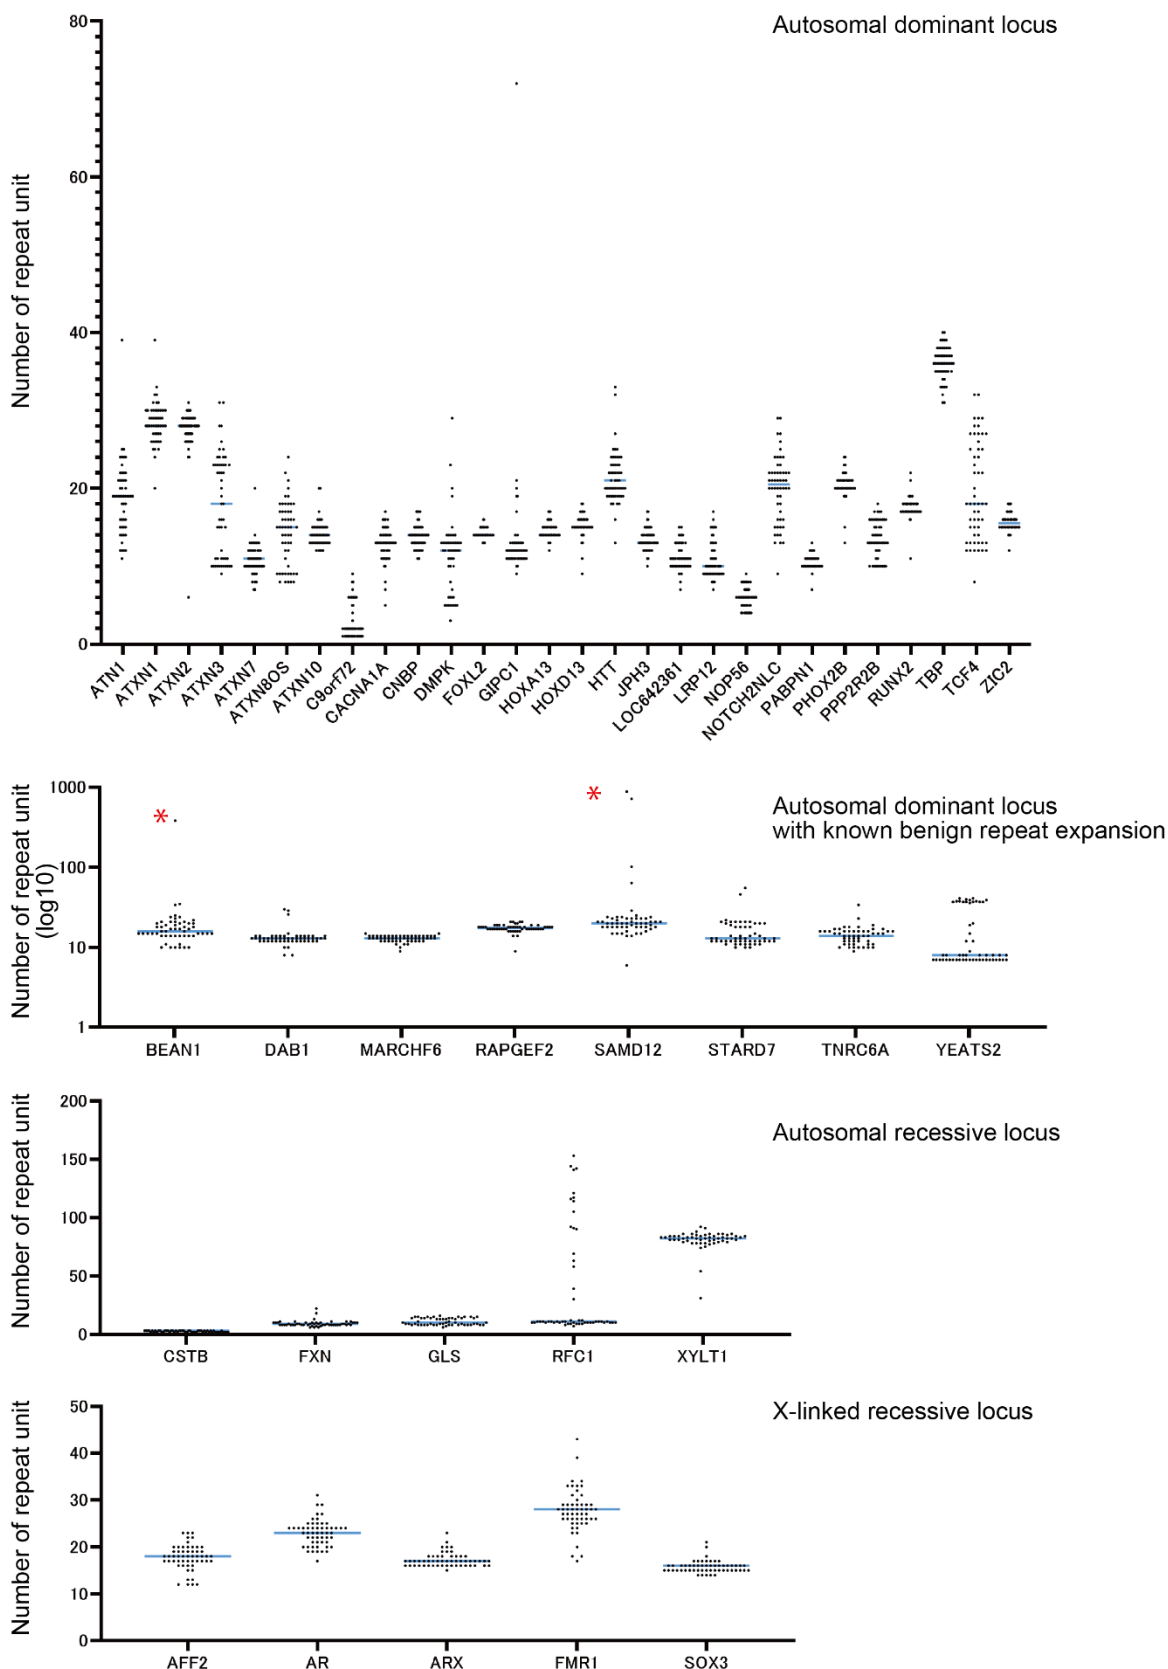

**Supplementary Figure 7 Distribution of the number of repeat units in 54 alleles from our 27 control samples at 46 loci relevant to known Mendelian repeat expansion diseases**

Blue horizontal bar indicates median number of repeat units. For autosomal dominant loci with known benign repeat expansion, the y-axis was set as log10 scale. There were a few expanded alleles in *BEAN1* and *SAMD12* that could not be distinguished from pathogenic expansion (\*).

**Supplementary Table 1 Ranked loci for possible pathogenicity in each patient in the validation study**

**Supplementary Table 2 Ranked loci for possible pathogenicity in each patient in the discovery study**

**Supplementary Table 4 Ranked loci for possible pathogenicity in six patients with SCA in the validation study and Tandem-genotypes results of SCA-associated loci for each patient**

**Supplementary Table 6 Primer sequences and PCR conditions used in this study**

These tables are separately provided in Excel files.

**Supplementary Table 3 Size comparisons of expanded repeat lengths in each patient obtained using conventional methods and T-LRS**

| Patient    | Gene           | Allele                     | Conventional method | Repeat length (bp)       |            | Comparison of two methods                                    |
|------------|----------------|----------------------------|---------------------|--------------------------|------------|--------------------------------------------------------------|
|            |                |                            |                     | Conventional method (bp) | T-LRS (bp) | Repeat length in conventional method /repeat length in T-LRS |
| Patient 1  | <i>HTT</i>     | allele 1                   | Fragment analysis   | 60                       | 54         | 1.11                                                         |
| Patient 1  | <i>HTT</i>     | allele 2                   | Fragment analysis   | 132                      | 126        | 1.05                                                         |
| Patient 3  | <i>CACNA1A</i> | allele 1                   | Fragment analysis   | 39                       | 39         | 1.00                                                         |
| Patient 3  | <i>CACNA1A</i> | allele 2                   | Fragment analysis   | 66                       | 66         | 1.00                                                         |
| Patient 7  | <i>PHOX2B</i>  | allele 2                   | Sanger sequencing   | 81                       | 78         | 1.04                                                         |
| Patient 9  | <i>RFC1</i>    | allele1 and 2 (homozygous) | Southern blotting   | 3527                     | 3112       | 1.13                                                         |
| Patient 13 | <i>CACNA1A</i> | allele 1                   | Fragment analysis   | 51                       | 48         | 1.06                                                         |
| Patient 13 | <i>CACNA1A</i> | allele 2                   | Fragment analysis   | 63                       | 63         | 1.00                                                         |
| Patient 15 | <i>CACNA1A</i> | allele 1                   | Fragment analysis   | 63                       | 60         | 1.05                                                         |
| Patient 15 | <i>CACNA1A</i> | allele 2                   | Fragment analysis   | 66                       | 63         | 1.05                                                         |
| Patient 18 | <i>RFC1</i>    | allele 1                   | Southern blotting   | 4199                     | 3569       | 1.18                                                         |
| Patient 18 | <i>RFC1</i>    | allele 2                   | Southern blotting   | 5140                     | 4941       | 1.04                                                         |
| Patient 19 | <i>RFC1</i>    | allele 1                   | Southern blotting   | 4346                     | 3411       | 1.27                                                         |
| Patient 19 | <i>RFC1</i>    | allele 2                   | Southern blotting   | 4346                     | 4637       | 0.94                                                         |

T-LRS: targeted long-read sequencing using adaptive sampling on GridION,

**Supplementary Table 5 Sequence performance of time-lag sampling in comparison with previous data obtained from long-read sequencing**

| Sample               | Previous result |                                             |                                          |                                              | Time-lag sampling |                                             |                                          |                                              | Comparison of two methods                                                                   |                                                                                             |
|----------------------|-----------------|---------------------------------------------|------------------------------------------|----------------------------------------------|-------------------|---------------------------------------------|------------------------------------------|----------------------------------------------|---------------------------------------------------------------------------------------------|---------------------------------------------------------------------------------------------|
|                      | Method          | Repeat unit sequence (allele 1), (allele 2) | Repeat length (bp) (allele 1)/(allele 2) | Number of repeat units (allele 1)/(allele 2) | Mean depth (×)    | Repeat unit sequence (allele 1), (allele 2) | Repeat length (bp) (allele 1)/(allele 2) | Number of repeat units (allele 1)/(allele 2) | Repeat length of allele 1 in previous result/repeat length of allele 1 in time-lag sampling | Repeat length of allele 2 in previous result/repeat length of allele 2 in time-lag sampling |
| Sample 1 (Patient 9) | T-LRS           | (1) AAGGG,<br>(2) AAGGG                     | 3112                                     | 622                                          | 15.76             | (1) AAGGG,<br>(2) AAGGG                     | 2944                                     | 589                                          | 1.06                                                                                        | NA                                                                                          |
| Sample 2             | HiFi            | (1) ACAGG,<br>(2) ACAGG                     | 6542/4551                                | 1308/910                                     | 11.41             | (1) ACAGG,<br>(2) ACAGG                     | 6478/4732                                | 1296/946                                     | 1.01                                                                                        | 0.96                                                                                        |
| Sample 3             | HiFi            | (1) AAGGG,<br>(2) AAGGG                     | 5154/2772                                | 1031/554                                     | 16.46             | (1) AAGGG,<br>(2) AAGGG                     | 5195/2669                                | 1039/534                                     | 0.99                                                                                        | 1.04                                                                                        |
| Sample 4             | HiFi            | (1) ACAGG,<br>(2) AAGGG                     | 5359/1552                                | 1072/310                                     | 16.18             | (1) ACAGG,<br>(2) AAGGG                     | 5499/1507                                | 1100/301                                     | 0.97                                                                                        | 1.03                                                                                        |

Samples 2, 3, and 4 were previously sequenced<sup>1</sup>. HiFi: high-fidelity long-read whole-genome sequencing using PacBio Sequel II system, T-LRS: targeted long-read sequencing using adaptive sampling on GridION, Number of repeat units was calculated as the expanded repeat length divided by 5. In Sample 1 (Patient 9), homozygous AAGGG repeat expansion was detected. NA: not available due to homozygosity.

**Supplementary Table 7 Targeted loci for GridION adaptive sampling**

| Chromosome | Start     | End       | Wild-type repeat sequence | Gene:disease                       | Site   | Reference |
|------------|-----------|-----------|---------------------------|------------------------------------|--------|-----------|
| 1          | 149340802 | 149440842 | GGC                       | <i>NOTCH2NLC</i> :NIID             | 5'-UTR | 2         |
| 2          | 96147066  | 96247124  | AAAAT                     | <i>STARD7</i> :FAME2               | intron | 2         |
| 2          | 176043058 | 176143103 | GGC                       | <i>HOXD13</i> :SDTY5               | coding | 2         |
| 2          | 190830872 | 190930920 | GCA                       | <i>GLS</i> :EIEE71                 | 5'-UTR | 2         |
| 3          | 63862685  | 63962715  | GCA                       | <i>ATXN7</i> :SCA7                 | coding | 2         |
| 3          | 129122576 | 129222656 | CAGG                      | <i>CNBP</i> :DM2                   | intron | 2         |
| 3          | 138896020 | 138996062 | GCAGCT                    | <i>FOXL2</i> :BPES                 | coding | 2         |
| 3          | 183662176 | 183762226 | TTTTA                     | <i>YEATS2</i> :FAME4               | intron | 2         |
| 4          | 3024876   | 3124939   | CAG                       | <i>HTT</i> :HD                     | coding | 2         |
| 4          | 39237455  | 39416362  | AAAAG                     | <i>RFC1</i> :CANVAS                | intron | 2         |
| 4          | 41695971  | 41796031  | GCC                       | <i>PHOX2B</i> :CCHS                | coding | 2         |
| 4          | 159292526 | 159392618 | AAAAT                     | <i>RAPGEF2</i> :FAME7              | intron | 2         |
| 5          | 10306338  | 10406411  | AAAAT                     | <i>MARCHF6</i> :FAME3              | intron | 2         |
| 5          | 146828728 | 146928758 | GCT                       | <i>PPP2R2B</i> :SCA12              | intron | 2         |
| 6          | 16277635  | 16377722  | TGC                       | <i>ATXN1</i> :SCA1                 | coding | 2         |
| 6          | 45372750  | 45472801  | GGC                       | <i>RUNX2</i> :CCD                  | coding | 2         |
| 6          | 170511907 | 170612021 | GCA                       | <i>TBP</i> :SCA17                  | coding | 2         |
| 7          | 27149924  | 27249966  | GCC                       | <i>HOXA13</i> :HFSGS               | coding | 2         |
| 8          | 104538970 | 104638999 | CCG                       | <i>LRP12</i> :OPDM                 | 5'-UTR | 2         |
| 8          | 118316812 | 118416918 | AAATA                     | <i>SAMD12</i> :FAME1               | intron | 2         |
| 9          | 27523528  | 27623546  | GCCCCG                    | <i>C9orf72</i> :FTDALS1            | intron | 2         |
| 9          | 68987286  | 69087304  | GAA                       | <i>FXN</i> :FRDA                   | intron | 2         |
| 10         | 79776383  | 79876404  | GGC                       | <i>LOC642361, NUTM2B-AS1</i> :OPDM | exon   | 2         |
| 12         | 6886716   | 6986773   | CAG                       | <i>ATNI</i> :DRPLA                 | coding | 2         |
| 12         | 111548950 | 111649019 | GCT                       | <i>ATXN2</i> :SCA2                 | coding | 2         |
| 13         | 70089383  | 70189428  | CTG                       | <i>ATXN8OS</i> :SCA8               | exon   | 2         |
| 13         | 99935448  | 100035493 | GCG                       | <i>ZIC2</i> :HPE5                  | coding | 2         |
| 14         | 23271472  | 23371502  | GCG                       | <i>PABPN1</i> :OPMD                | coding | 2         |
| 14         | 92021010  | 92121040  | CTG                       | <i>ATXN3</i> :SCA3                 | coding | 2         |

|    |           |           |                      |                                                   |            |   |
|----|-----------|-----------|----------------------|---------------------------------------------------|------------|---|
| 16 | 24563438  | 24663532  | AAAAT                | <i>TNRC6A</i> :FAME6                              | intron     | 2 |
| 16 | 66440396  | 66540466  | AATAA                | <i>BEAN1</i> :SCA31                               | intron     | 2 |
| 16 | 87554287  | 87654329  | GCT                  | <i>JPH3</i> :HDL2                                 | intron     | 2 |
| 17 | 80096992  | 80197139  | GCCGCTGCCGACCTCGCTGT | <i>EIF4A3</i> :RCPS                               | 5'-UTR     | 2 |
| 18 | 55536153  | 55636229  | AGC                  | <i>TCF4</i> :FECD3                                | intron     | 2 |
| 19 | 13157858  | 13257897  | CAG                  | <i>CACNA1A</i> :SCA6                              | coding     | 2 |
| 19 | 14446041  | 14546075  | CCG                  | <i>GIPC1</i> :OPDM                                | 5'-UTR     | 2 |
| 19 | 45720204  | 45820264  | CAG                  | <i>DMPK</i> :DM1                                  | 3'-UTR     | 2 |
| 20 | 2602733   | 2702757   | GGGCCT               | <i>NOP56</i> :SCA36                               | intron     | 2 |
| 21 | 43726443  | 43826479  | CCCCGCCCGCG          | <i>CSTB</i> :ULD/EPM1                             | promoter   | 2 |
| 22 | 45745354  | 45845424  | ATTCT                | <i>ATXN10</i> :SCA10                              | intron     | 2 |
| X  | 67495317  | 67595386  | GCA                  | <i>AR</i> :SBMA                                   | coding     | 2 |
| X  | 24963649  | 25063697  | GCC                  | <i>ARX</i> :EIEE1                                 | coding     | 2 |
| X  | 140454316 | 140554361 | GGC                  | <i>SOX3</i> :MRGH                                 | coding     | 2 |
| X  | 147862050 | 147962110 | GGC                  | <i>FMR1</i> :FXTAS                                | 5'-UTR     | 2 |
| X  | 148450637 | 148550682 | GCC                  | <i>AFF2</i> :FRAXE                                | 5'-UTR     | 2 |
| 1  | 57317044  | 57417080  | AAAAT                | <i>DAB1</i> :SCA37                                | intron     | 3 |
| 2  | 100055032 | 100155449 | GCC                  | <i>AFF3</i> :FRA2A                                | 5'-UTR     | 3 |
| 7  | 55837601  | 55937639  | GCG                  | <i>ZNF713</i> :FRA7A                              | 5'-UTR     | 3 |
| 10 | 93652417  | 93752625  | CCG                  | <i>FRA10AC1</i> :FRA10A                           | 5'-UTR     | 3 |
| 11 | 66694819  | 66794845  | GGC                  | <i>C11orf80</i> :FRA11A                           | 5'-UTR     | 3 |
| 11 | 119156290 | 119256323 | CGG                  | <i>CBL2</i> :FRA11B                               | 5'-UTR     | 3 |
| 12 | 50454917  | 50555171  | GGC                  | <i>DIP2B</i> :FRA12A                              | 5'-UTR     | 3 |
| 15 | 22736671  | 22836703  | GCG                  | <i>NIPAI</i> :ALS                                 | coding     | 3 |
| 16 | 17420675  | 17521168  | GGC                  | <i>XYLT1</i> :BSS                                 | promoter   | 3 |
| 19 | 18736035  | 18836050  | CGT                  | <i>COMP</i> :PSACH/MED                            | coding     | 3 |
| X  | 71390295  | 71490888  | CCCTCT               | <i>TAF1</i> :XDP                                  | intron     | 3 |
| X  | 149581570 | 149681808 | CCG                  | <i>TMEM185A</i> :FRAXF                            | 5'-UTR     | 4 |
| 1  | 154819691 | 154919908 | GCT                  | <i>KCNN3</i> :Schizophrenia, migraines            | 3' of gene | 4 |
| 20 | 47601044  | 47701202  | GCAGCA               | <i>AIB, SRC-3, NCOA3</i> :Prostate, breast Cancer | coding     | 4 |
| 16 | 67260029  | 67300029  | C>T                  | <i>PLEKHG4</i> :SCA31                             | 5'-UTR     | 5 |

UTR, untranslated region. References are shown in Supplementary References. For disease, ALS: amyotrophic lateral sclerosis, BPES: blepharophimosis, ptosis and epicanthus inversus, BSS:

Baratela-Scott syndrome, CANVAS: cerebellar ataxia, neuropathy and vestibular areflexia syndrome, CCD: cleidocranial dysplasia, CCHS: congenital central hypoventilation syndrome, DM: myotonic dystrophy, DRPLA: dentatorubral-pallidoluysian atrophy, EIEE: early infantile epileptic encephalopathy, EPM: progressive myoclonus epilepsy, FAME: familial adult myoclonic epilepsy, FECD: Fuchs endothelial corneal dystrophy, FRA: fragile site, FRDA:Friedreich ataxia, FTD/ALS: frontotemporal dementia/amyotrophic lateral sclerosis, FXTAS: fragile X-associated tremor ataxia syndrome, HD: Huntington disease, HDL2:Huntington disease-like 2, HFGS: hand-foot-genital syndrome, HPE: holoprosencephaly, MED: multiple epiphyseal dysplasia, MRGH: mental retardation with isolated growth hormone deficiency, NIID: neuronal intranuclear inclusion disease, OPDM: oculopharyngodistal myopathy, OPMD: oculopharyngeal muscular dystrophy, PSAHC: Pseudoachondroplasia, RCPS: Richieri-Costa-Pereira syndrome, SBMA: spinal and bulbar muscular atrophy, SCA: spinocerebellar ataxia, SDTY: Syndactyly, ULD: Unverricht-Lundborg disease, XDP: X-linked dystonia parkinsonism.

## Supplementary References

- 1 Miyatake, S. et al. Repeat conformation heterogeneity in cerebellar ataxia, neuropathy, vestibular areflexia syndrome. *Brain* **145**, 1139-1150 (2022).
- 2 Tang, H. et al. Profiling of Short-Tandem-Repeat Disease Alleles in 12,632 Human Whole Genomes. *Am. J. Hum. Genet.* **101**, 700-715 (2017).
- 3 Yu, J. et al. The GGC repeat expansion in NOTCH2NLC is associated with oculopharyngodistal myopathy type 3. *Brain* **144**, 1819-1832 (2021).
- 4 Castelli, L. M., Huang, W. P., Lin, Y. H., Chang, K. Y. & Hautbergue, G. M. Mechanisms of repeat-associated non-AUG translation in neurological microsatellite expansion disorders. *Biochem. Soc. Trans.* **49**, 775-792 (2021).
- 5 Ishikawa, K. et al. An autosomal dominant cerebellar ataxia linked to chromosome 16q22.1 is associated with a single-nucleotide substitution in the 5' untranslated region of the gene encoding a protein with spectrin repeat and Rho guanine-nucleotide exchange-factor domains. *Am. J. Hum. Genet.* **77**, 280-296 (2005).
